# Supplementary material
Source: PubMed Central journal article supplement (PMC3306164)
Supplement: NIHMS289433-supplement-1.pdf [file NIHMS289433-supplement-1.pdf]

## Supplementary Figure 1

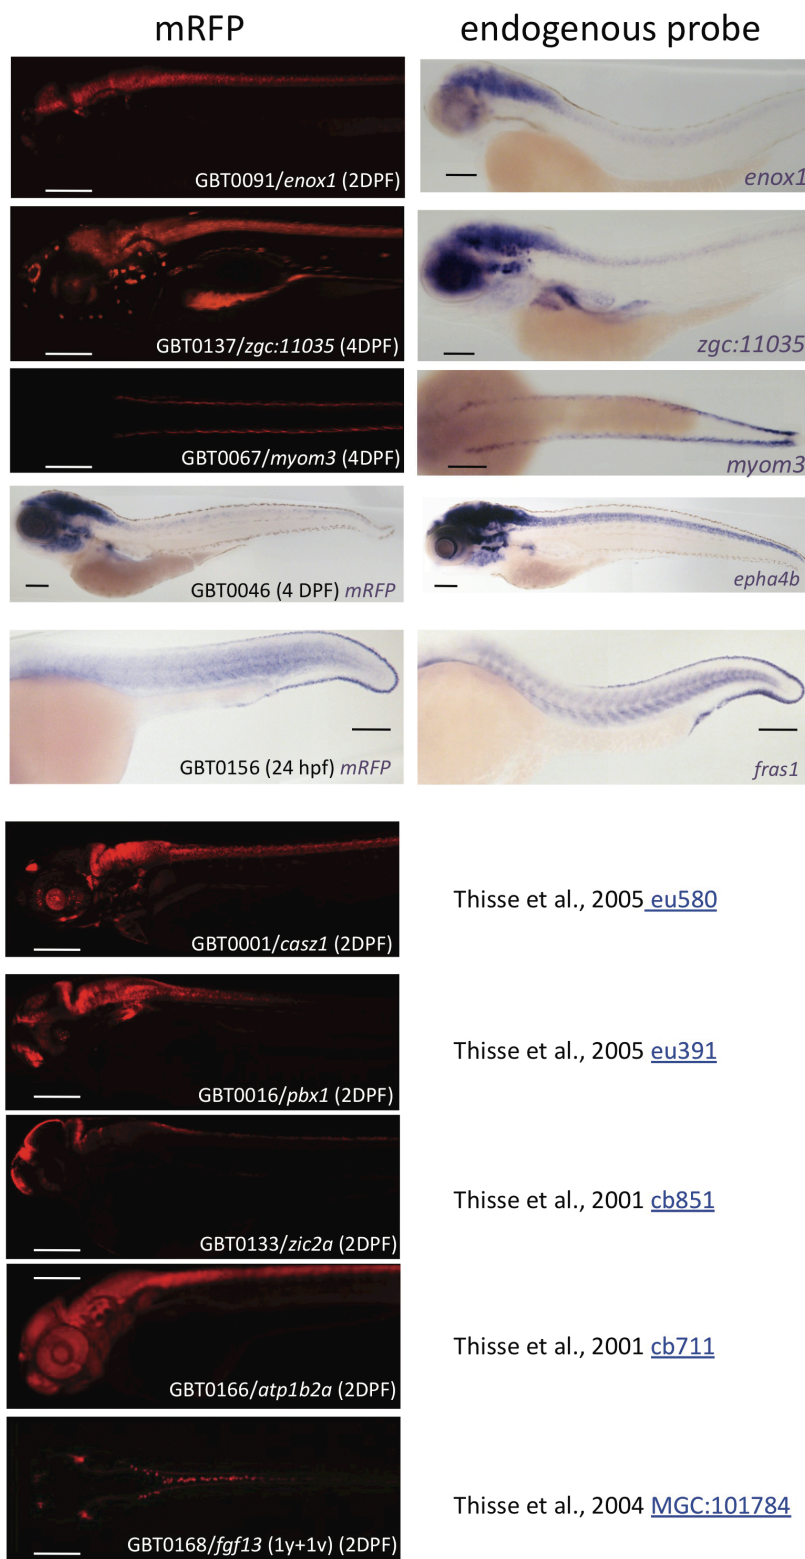**mRFP localization and****corresponding endogenous**

**patterns.** Shown in the left column are mRFP fluorescence patterns or *in situ* using antisense mRFP probe in GBT lines with secreted fusion proteins. The right column shows the endogenous gene expression pattern as determined by *in situ* hybridization with a gene-specific probe or lists the probe identifier and reference from publicly available images available at <http://zfin.org>. The images show near matches in expression with subtle differences likely due to several factors. First, the mRFP fusion protein has different kinetics than the mRNA that produces it— as translation occurs after transcription, the protein half-life can be different than the mRNA half-life. Second, the mRFP fusion transcript lacks the nascent 3'UTR that may affect differential spatiotemporal mRNA stability of the endogenous transcript. Third, the mRFP trap may only affect a subset of the transcripts detected by whole-mount *in situ* hybridization. Such is the case for GBT0168/*fgf13* 1y+1v isoform, which is more specific than the *in situ* against all *fgf13* transcripts. Lastly, the quality of imaging from live fish for mRFP fluorescence can exceed the imaging of colorimetric reactions used in a typical whole-mount *in situ* hybridization.<sup>1-3</sup>

## Supplementary Figure 2

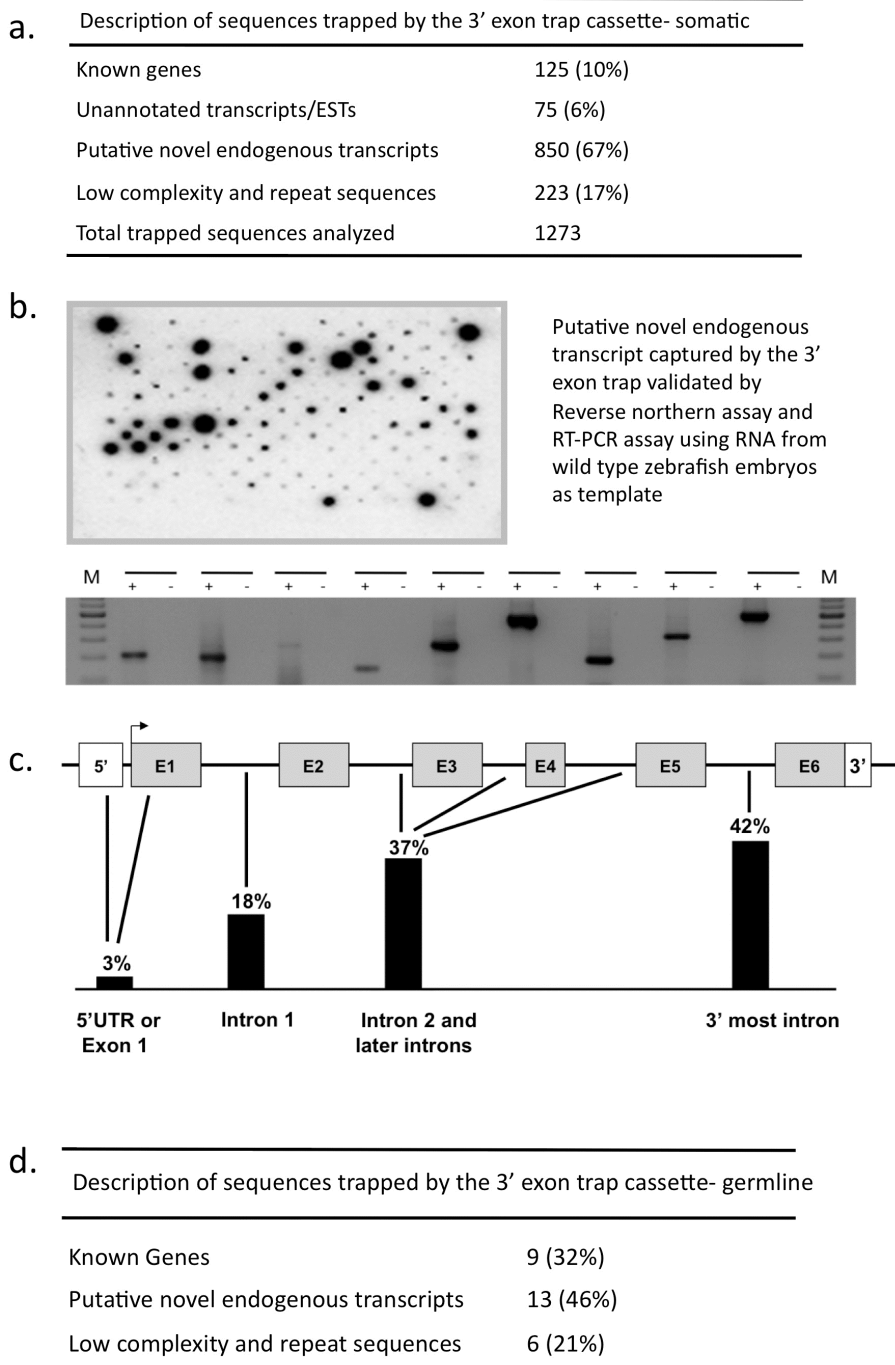

**Evaluation of 3' exon trap integration sites in zebrafish.** (a) Description of the sequence captured by the 3' exon trap cassette following somatic integration in the zebrafish genome. (b) Reverse northern blot and RT-PCR of RNA from 24-hour post fertilization wild type zebrafish embryos following somatic integration of a 3' exon trap performed on trapped sequences that map to the gene and transcript-free region of the zebrafish genome. The data reveals that a significant subset (75%) of these transcripts is expressed during this single stage in zebrafish development. (c) Distribution of the 3' exon trap integration within 100 well-annotated zebrafish genes. (d) Description of sequences trapped by the 3' exon trap cassette in the germline of zebrafish.

## Supplementary Figure 3

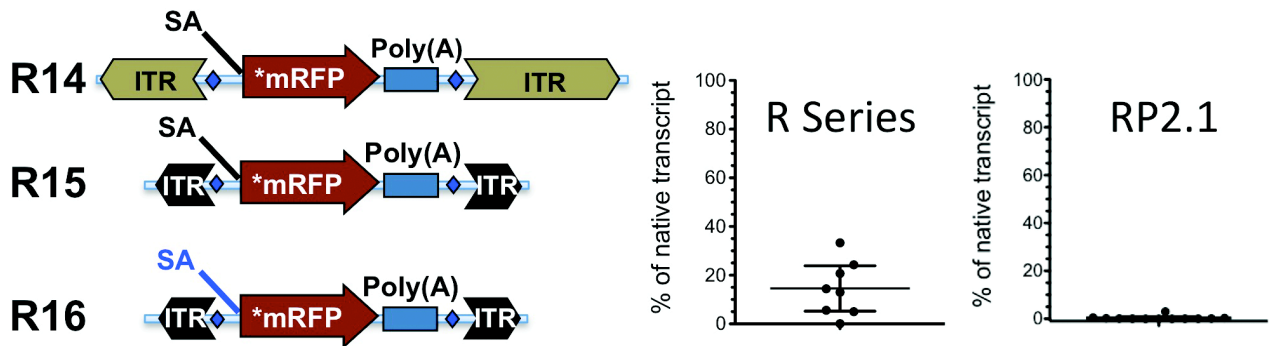

**Early generation protein trapping gene-break transposons.** A schematic of R14, R15, and R16 are shown. Key differences from RP2 are the lack of the 3' exon trap and the use of a simple polyadenylation signal (poly(A)) from the zebrafish beta-actin gene instead of the poly(A) with a terminator and putative border element from the ocean pout antifreeze gene. R14 used the full-length Tol2 inverted terminal repeats (ITR). R15 uses the mini-Tol2 ITR sequences. R16 has a splice-acceptor from the zebrafish beta-actin gene rather than the carp beta-actin gene.

### Supplementary Table 1

| <b>Oligo Name</b> | <b>DNA sequence</b>                      |
|-------------------|------------------------------------------|
| mRFP/Bam-F1       | GGATCCACCATGGCCTCCTCCGAGGA               |
| mRFP/Cla-R1       | ATCGATTAGGCGCCGGTGGAGTG                  |
| cd99l2-F1         | ATGGAGAAGACGCTCTGGACATG                  |
| mRFP-R1           | CGATCTCGAACTCGTGGCCGTTCA                 |
| CDS-*mRFP-F1      | AAGAATTTCGAAGGTGCCTCCTCCGAGGATGTCATCAAGG |
| CDS-mRFP-R1       | AAACTAGTCTTAGGCTCCGGTGGAGTGGCGG          |
| 5R-mRFP-P0        | TGGAGCCGTACTGGAACCTGA                    |
| 5R-mRFP-P1        | CGCCCTTGGTCACCTTCAGCTT                   |
| 5R-mRFP-P2        | CCTTGAAGCGCATGAACTCCTTGAT                |
| INV-OPT-P1        | ATCCCTCACTCCCGTAGCTGTCCA                 |
| INV-OPT-P2        | GCGAGCCAAACCTGTCTGGTGTA                  |
| 5R-GFP-P1         | TGCATCACCTTCACCCTCTCCACT                 |
| 5R-GFP-P2         | GGAAATTTGTGCCCATTAACATCACC               |
| ToI2-ITR(L)-O1    | AATTAAACTGGGCATCAGCGCAATT                |
| ToI2-ITR(L)-O3    | CCAAGGAAAAATAGAATGAAGTGATCTCCA           |
| RT-RPS6Kb1-F1     | AAATCTCTATGGCGCTCGGACACC                 |
| RT-RPS6Kb1-R1     | TGGACTCCTTACACGCCCGAAATC                 |
| <u>GBM1</u>       | ATTCCGGCTGAACTGTAAATGAATG                |
| <u>GBM2</u>       | CTGTAAATGAATGAGAAAACCGGTT                |
| Adapter primer    | GGCCACGCGTCGACTAGTASTTTTTTTTTTTTTTTTTTTT |

**Oligo names and sequences.** Oligos mentioned in the text or methods are listed here with corresponding sequence listed 5' to 3'. Morpholinos are underlined.

**Supplementary Table 2**

| <b>Vector</b> | <b>Line</b> | <b>Gene ID</b>         | <b>QRT Forward Primer</b>    | <b>QRT Reverse Primer</b>     |
|---------------|-------------|------------------------|------------------------------|-------------------------------|
| R15           | GBT0001     | <i>casz1</i>           | TGTTTCTCCCAGGCCAGCTTACATC    | GCTTGGCACAGATCGCATTCAGTT      |
| R15           | GBT0002     | <i>si:ch211-51g4.4</i> | AACTTCTCCAGTGCCAAGCAAAGC     | CCAGGCATTAGGACTGAAAGTAGGCA    |
| R15           | GBT0005     | <i>itgblb</i>          | TGGACGTAAGGCTGCTCCTGATTTTC   | GCCGAAGCCTTGGTGCATTCAT        |
| R16           | GBT0007     | <i>C14ORF102</i>       | CTTCTCTGGACTGTCAGGCAGCAAC    | GCTCGCTGGTGGTGTCTTCAAAGCA     |
| R14           | GBT0019     | <i>k2p10.1</i>         | GGAAACAGGTGAACTGGGATCCTGAAAC | GGGTTCATGCATGGCCGAAACA        |
| R14           | GBT0031     | <i>tnnt2a</i>          | GTTGCCATGTTTTGAAAGCTGTGTGC   | TCCATGAAAAAACAGAAGCCGTCAGT    |
| R15           | GBT0039     | <i>gabbr1.2</i>        | CGACCACCTAGAGATGGAGGGATCAG   | CGCCCTTGGTCACCTTCAGCTT        |
| RP2           | GBT0040     | <i>hoxA3a</i>          | AAACGCACCGACCGGATTTACTC      | CGCCGTTTTCCAATGTTTATTTCA      |
| RP2           | GBT0040     | <i>hoxA4a</i>          | AAACGCACCGACCGGATTTACTC      | TTTTCAAGCTCAAGAGCCTGCTGG      |
| R15           | GBT0043     | <i>CD9912</i>          | TCGCAGATGCCCTAAACCCTGAC      | TGTCGGGTTTTGTAAGAGTTATCGTTTCC |
| RP2           | GBT0067     | <i>myom3</i>           | TGACAGCAGAGGAGAAGACGACACTATC | GCAGTAAAGCTTGAAGCCCTGCG       |
| RP2           | GBT0078     | <i>grip1</i>           | GAAGAATGTGGGGGAAAGGGTTGT     | CACCTCCACGTTTTTTGAACATGACC    |
| RP2           | GBT0125     | <i>LOC100333685</i>    | TTATTTCGGCGAGAGGAGAGGACG     | TGAAGTGATAGCAGTTGCGTCCGAAT    |
| RP2           | GBT0126     | <i>nrp2b</i>           | TGGAAGAATGGAATCGCTTTACGCT    | AATCCGGAAGAAGGCCAGAGAGC       |
| RP2           | GBT0137     | <i>zgc:110335</i>      | GGCTGGAAGATCACCCGAAAGG       | ATTCTGTCTCAACACGCCCCA         |
| RP2           | GBT0141     | <i>gpm6ba</i>          | AAACCAGAATCGACGGCTGAGGA      | CAAAGAGGCATATGGGACACCACC      |
| RP2           | GBT0156     | <i>fras1</i>           | CTGCTCAAAGGCTCTGATCTTGAACC   | CCACACAGACCCTACAGGACGAATG     |
| RP2           | GBT0348     | <i>ryr1b</i>           | GGAGCAGCTGAGATGGTTCTGCAA     | TGTTGCCGCCATTAAGGATTGAGAT     |

**Quantitative PCR primer pairs for GBT lines.** Listed are the GBT vector, line designator, gene identifier, and the corresponding forward and reverse primer sequences used for QRT.

## Supplementary Note.

**3' exon-trap cassette efficiency in zebrafish.** In Figure S2, we have generated random insertions of the 3' exon trap cassette in the somatic tissue of zebrafish to study the pattern of sequences trapped by the 3' exon trap cassette. A total of 1273 somatic insertion events were generated and analyzed by 3' RACE (Rapid Amplification of cDNA ends) technique as described<sup>4</sup>. An identity search using BLAT function<sup>5</sup> at UCSC Genome Browser (<http://genome.ucsc.edu>) against the zebrafish reference genome (Zv8 assembly) was used to map the trapped sequences to the genome. Genomic sequences with over 94% identity to the trapped sequence were considered as significant matches. The annotation status, exon prediction and exon–intron boundary of the trapped sequence were also identified where possible. The bioinformatics analysis and mapping of the captured sequences to the zebrafish genome reveal that 10% ( $n = 125$ ) of the insertions occurred within well-annotated genes in the zebrafish genome. 6% ( $n = 75$ ) of the insertions trapped un-annotated transcripts or expressed sequence tags in the zebrafish genome. 67% ( $n = 850$ ) of the insertions mapped to gene and transcript-free regions in the zebrafish genome, and 17% ( $n = 223$ ) of the trapped sequences were considered as low complexity based on the sequence composition or repetitive sequences for which we could not assign any genomic location.

Since a large proportion (67%) of the trapped sequences mapped to gene and transcript-free regions of the zebrafish genome, we conducted reverse northern blotting and RT-PCR using RNA from 24-hour post fertilization wild type embryos. This demonstrated that a subset (75%) of the trapped sequences that map to the gene and transcript-free region of the zebrafish genome are actually expressed during zebrafish development (Fig. S2B). We also studied the distribution of the 3' exon trap integration within 100 well-annotated zebrafish genes (Fig. S2C). The 3' exon trap cassette is capable of trapping most exons of genes with almost equal efficiency except for the exons at the 5' end of a gene.

In addition to the somatic integration data, we have collated the germline integration data of 3' exon trapping from two published articles<sup>4,6</sup>. The 3' exon trapped sequences were used to conduct an identity search using BLAT function<sup>5</sup> at UCSC Genome Browser (<http://genome.ucsc.edu>) against the zebrafish reference genome (Zv8 assembly). Genomic sequences with over 94% identity to the trapped sequence were considered as significant matches. The annotation status, exon prediction and exon–intron boundary of the trapped sequence were also identified.

A total of 28 trapped genomic sequences were analyzed from both published articles. The 3' exon trap cassette could capture known and putative novel endogenous transcripts ( $n = 22$ , 78%) in the zebrafish genome. 21% ( $n = 6$ ) of the time the 3' exon trap captured sequences that were considered as low complexity based on sequence composition or repetitive sequences for which we could not assign any genomic location. We also studied the distribution of the 3' exon trap integration within 8 well-annotated zebrafish loci (Fig. S2D). The 3' exon trap cassette is capable of integration within genes of diverse genetic structures in the zebrafish genome. Importantly, the use of the  $\beta$ -actin promoter may aid in protection against transcript degradation from nonsense-mediated decay as was observed in mammalian systems using the human  $\beta$ -actin promoter<sup>7</sup>.

**Supplementary References:**

- 1 Thisse, B. *et al.* Expression of the zebrafish genome during embryogenesis (NIH R01 RR15402). ZFIN Direct Data Submission, <http://zfin.org> (2001).
- 2 Thisse, B. & Thisse, C. Fast release clones: a high throughput expression analysis. ZFIN Direct Data Submission, <http://zfin.org> (2004).
- 3 Thisse, B. & Thisse, C. High throughput expression analysis of ZF-models consortium clones. ZFIN Direct Data Submission, <http://zfin.org> (2005).
- 4 Sivasubbu, S. *et al.* Gene-breaking transposon mutagenesis reveals an essential role for histone H2afza in zebrafish larval development. *Mech Dev* **123**, 513-529, doi:10.1016/j.mod.2006.06.002 (2006).
- 5 Kent, W. J. BLAT--the BLAST-like alignment tool. *Genome Res* **12**, 656-664, doi:10.1101/gr.229202. Article published online before March 2002 (2002).
- 6 Petzold, A. M. *et al.* Nicotine response genetics in the zebrafish. *Proc Natl Acad Sci USA*, doi:10.1073/pnas.0908247106 (2009).
- 7 Tsakiridis, A. *et al.* Expression-independent gene trap vectors for random and targeted mutagenesis in embryonic stem cells. *Nucleic Acids Res* **37**, e129, doi:10.1093/nar/gkp640 (2009).
